# Supplementary material
Source: Research Square preprint supplement (doi:10.21203/rs.3.rs-9615064/v1)
Supplement: Supplementary file 1 [file Medical Ethics Certificate.pdf › Extended Data/Medical Ethics Certificate.pdf]

|                                                                                                                                                                                                                                                                                                                                                                                                                    |                                                                                                                                                                                             |                       |                |
|--------------------------------------------------------------------------------------------------------------------------------------------------------------------------------------------------------------------------------------------------------------------------------------------------------------------------------------------------------------------------------------------------------------------|---------------------------------------------------------------------------------------------------------------------------------------------------------------------------------------------|-----------------------|----------------|
| 浙江大学医学院附属第二医院人体研究伦理委员会伦理审查批件                                                                                                                                                                                                                                                                                                                                                                                       |                                                                                                                                                                                             |                       |                |
| 项目受理号：研2024-0766 事件受理号：I2024961                                                                                                                                                                                                                                                                                                                                                                                    |                                                                                                                                                                                             | 批件号：（2024）伦审研第（0994）号 |                |
| 项目名称                                                                                                                                                                                                                                                                                                                                                                                                               | 粪便中梭菌和芽孢杆菌的筛查及分子流行病学研究                                                                                                                                                                      |                       |                |
| 申请类型                                                                                                                                                                                                                                                                                                                                                                                                               | 注册研究： <input type="checkbox"/> 药物临床试验 <input type="checkbox"/> 器械临床试验 <input type="checkbox"/> 特医食品临床试验<br>非注册研究： <input checked="" type="checkbox"/> 临床科研 <input type="checkbox"/> 上市后产品研究 |                       |                |
| 药/械分类                                                                                                                                                                                                                                                                                                                                                                                                              | /                                                                                                                                                                                           | 试验分期                  | /              |
| 申办方                                                                                                                                                                                                                                                                                                                                                                                                                | 浙江大学医学院附属第二医院                                                                                                                                                                               |                       |                |
| CRO                                                                                                                                                                                                                                                                                                                                                                                                                | /                                                                                                                                                                                           |                       |                |
| 承担科室                                                                                                                                                                                                                                                                                                                                                                                                               | 检验科                                                                                                                                                                                         | 主要研究者PI               | 张嵘             |
| <input checked="" type="checkbox"/> 负责 <input type="checkbox"/> 参加                                                                                                                                                                                                                                                                                                                                                 | 组长单位：/                                                                                                                                                                                      | 组长单位PI                | /              |
| 审查文件                                                                                                                                                                                                                                                                                                                                                                                                               |                                                                                                                                                                                             |                       |                |
| 序号                                                                                                                                                                                                                                                                                                                                                                                                                 | 材料名称                                                                                                                                                                                        | 版本号                   | 语言/版本日期        |
| 1                                                                                                                                                                                                                                                                                                                                                                                                                  | 浙大二院人体研究申请表                                                                                                                                                                                 |                       | 中文 /           |
| 2                                                                                                                                                                                                                                                                                                                                                                                                                  | 临床研究方案                                                                                                                                                                                      | V202401               | 中文 /2024-07-28 |
| 3                                                                                                                                                                                                                                                                                                                                                                                                                  | GCP培训证书                                                                                                                                                                                     |                       | 中文             |
| 4                                                                                                                                                                                                                                                                                                                                                                                                                  | 主要研究者简历及参加人员简介                                                                                                                                                                              |                       | 中文             |
| 5                                                                                                                                                                                                                                                                                                                                                                                                                  | 研究者岗位职责                                                                                                                                                                                     |                       | 中文             |
| 6                                                                                                                                                                                                                                                                                                                                                                                                                  | 临床研究项目负责人承诺书                                                                                                                                                                                |                       | 中文 /           |
| 7                                                                                                                                                                                                                                                                                                                                                                                                                  | 免除知情同意申请表                                                                                                                                                                                   |                       | 中文 /           |
| 审查形式                                                                                                                                                                                                                                                                                                                                                                                                               | 本次审查： <input type="checkbox"/> 会议审查 <input checked="" type="checkbox"/> 快速审查                                                                                                                |                       |                |
| 审查日期                                                                                                                                                                                                                                                                                                                                                                                                               | 本次审查日期：2024-08-17                                                                                                                                                                           | 会议地点                  | /              |
| 审查委员                                                                                                                                                                                                                                                                                                                                                                                                               | 徐荣臻 姚梅琪                                                                                                                                                                                     |                       |                |
| 审查结论                                                                                                                                                                                                                                                                                                                                                                                                               | 1. 经本人体伦理审查委员会审查，审查结果：同意。意见和建议：<br>2. 跟踪审查频率： <input type="checkbox"/> 6个月 <input checked="" type="checkbox"/> 12个月 <input type="checkbox"/> 其它_____<br>3. 下次跟踪审查日期：2025年08月16日             |                       |                |
| 主任/副主任委员签名：吴艺策                                                                                                                                                                                                                                                                                                                                                                                                     |                                                                                                                                                                                             |                       |                |
| 浙江大学医学院附属第二医院人体研究伦理委员会（盖章）                                                                                                                                                                                                                                                                                                                                                                                         |                                                                                                                                                                                             |                       |                |
| 研究注意事项：<br>1. 若研究涉及人类遗传资源审批事项，请务必按照国家相关规定做好审批。<br>2. 研究开展前请及时到《医学研究登记备案信息系统》完成备案。<br>3. 研究开展前请及时到《https://clinicaltrials.gov》完成注册。<br>4. 在研究中请遵守GCP和《赫尔辛基宣言》的原则。<br>5. 严格遵循批准的方案开展研究，研究过程中对临床研究方案、知情同意书等材料的任何修改及主要研究者变更等，请提交修改申请，得到伦理委员会批准后方可继续实施。<br>6. 请提前1个月提交跟踪审查申请，本伦理委员会根据跟踪审查的结果作出新的决定。<br>7. 按要求书面上报严重不良事件，本伦理委员会将根据严重不良事件报告作出审查决定。<br>8. 方案违背/偏离、暂停/终止均应提供书面报告。<br>9. 研究结束提供总结报告。<br>10. 及时书面报告中心伦理的重要决定。 |                                                                                                                                                                                             |                       |                |

浙江大学医学院附属第二医院人体研究伦理委员名单

| 伦理委员会职务 | 姓名  | 性别 | 专业        | 职称    | 工作单位          |
|---------|-----|----|-----------|-------|---------------|
| 主任委员    | 吴志英 | 女  | 神经病学      | 主任医师  | 浙大二院          |
| 副主任委员   | 胡新央 | 女  | 心血管内科     | 主任医师  | 浙大二院          |
| 委员      | 林铮  | 男  | 临床医学      | 主任医师  | 浙大二院          |
| 委员      | 戴海斌 | 男  | 药学        | 主任药师  | 浙大二院          |
| 委员      | 朱君明 | 男  | 神经外科      | 主任医师  | 浙大二院          |
| 委员      | 晋秀明 | 男  | 眼科学       | 主任医师  | 浙大二院          |
| 委员      | 姚梅琪 | 女  | 护理        | 主任护师  | 浙大二院          |
| 委员      | 施卫星 | 男  | 医学伦理学     | 教授    | 浙江大学医学院       |
| 委员      | 徐江陵 | 男  | 法律学       | 专职律师  | 国浩律师集团（杭州事务所） |
| 委员      | 史崇义 | 男  | 文化事业管理    | 高级政工师 | 浙江歌舞剧院        |
| 委员      | 余红  | 男  | 心血管       | 教授    | 浙大二院          |
| 委员      | 徐荣臻 | 男  | 血液        | 研究员   | 浙大二院          |
| 委员      | 陈泽鑫 | 男  | 流行病与生物统计学 | 统计师   | 浙大二院          |
| 委员      | 薛静  | 女  | 风湿免疫科     | 主任医师  | 浙大二院          |
| 委员      | 李江涛 | 男  | 外科        | 主任医师  | 浙大二院          |
| 委员      | 董颖  | 女  | 肿瘤学       | 主任医师  | 浙大二院          |
| 委员      | 殷鑫滨 | 女  | 神经内科学     | 主任医师  | 浙大二院          |
| 委员      | 程海英 | 女  | 儿科        | 副主任医师 | 浙大二院          |
| 委员      | 谭延斌 | 男  | 骨科学       | 副主任医师 | 浙大二院          |
| 委员      | 兰芬  | 女  | 呼吸内科学     | 主任医师  | 浙大二院          |
| 委员      | 沈虹  | 女  | 肿瘤内科学     | 主任医师  | 浙大二院          |
| 委员      | 牛宇龙 | 男  | 法律学       | 三级律师  | 浙大一院          |

委员名单根据医院聘任文件为准

浙江大学医学院附属第二医院人体研究伦理委员会的组成及操作方式严格遵循GCP（包括ICH-GCP）及相关法律法规的规定，实施各项操作规程。

地址：浙江省杭州市解放路88号 310009 联系电话：0571—87783759 传真：0571—87783969

浙江大学医学院附属第二医院  
人体研究伦理委员会  
(1)
