# Supplementary material
Source: Research Square preprint supplement (doi:10.21203/rs.3.rs-9615064/v1)
Supplement: Supplementary file 2 [file f877bf8af1ec878c483554eb.pdf]

Table1 Antimicrobial susceptibility test results

| Strain    | Penicillin | Erythromycin | Tetracycline | Gentamicin | Florfenicol | Linezolid | Clindamycin | Vancomycin |
|-----------|------------|--------------|--------------|------------|-------------|-----------|-------------|------------|
| C.p.7-7-3 | ≤0.12      | >256         | 16           | 2048       | 64          | 8         | >128        | 0.25       |
| C.p.3TC   | 1          | >256         | 32           | 16         | 16          | 8         | 2           | 0.25       |
| BJA1FB    | 2          | >256         | 128          | >2048      | 32          | 8         | >128        | 1          |
| BJA3FB    | 1          | >256         | >128         | >2048      | 64          | 16        | >128        | 0.5        |
| _BRX      |            |              |              |            |             |           |             |            |
| BJA4FB    | 1          | >256         | 128          | >2048      | 64          | 8         | >128        | 0.5        |
| _BRX      |            |              |              |            |             |           |             |            |
| BJA5FB    | 1          | >256         | 64           | >2048      | 32          | 8         | >128        | 0.5        |
| _BRX      |            |              |              |            |             |           |             |            |
| BJA6FB    | 0.25       | >256         | 64           | >2048      | 32          | 32        | >128        | 0.5        |
| _BRX      |            |              |              |            |             |           |             |            |
| C.p.2.001 | 0.25       | 32           | 16           | 32         | 16          | 8         | 128         | 0.5        |
| C.p.2.002 | 0.5        | 64           | 64           | 64         | 32          | 8         | 128         | 0.25       |
| C.p.2.003 | 0.5        | >256         | 64           | 32         | 16          | 8         | >128        | 0.5        |
| C.p.2.004 | 0.25       | 64           | 32           | 64         | 16          | 8         | 64          | 0.25       |
| C.p.2.007 | 0.25       | 16           | 16           | 16         | 16          | 8         | 16          | 0.5        |
| C.p.2.008 | 2          | >256         | 32           | 32         | 16          | 8         | 8           | 0.25       |
| C.p.2.009 | 1          | >256         | 16           | 32         | 4           | 8         | 4           | 0.5        |
| C.p.2.012 | 0.5        | >256         | 32           | 64         | 16          | 8         | >128        | 0.25       |
| C.p.2.020 | 0.5        | >256         | 32           | 64         | 4           | 8         | 64          | 0.25       |
| C.p.2.035 | 0.25       | >256         | 32           | 32         | 16          | 8         | 16          | 0.25       |
| C.p.2.037 | ≤0.12      | >256         | 32           | 16         | 8           | 8         | 4           | 0.25       |
| C.p.2.052 | 0.5        | >256         | 32           | 32         | 16          | 8         | 128         | 0.5        |
| C.p.2.053 | 0.25       | >256         | 64           | 64         | 16          | 8         | 32          | 0.25       |
| C.p.2.056 | 0.5        | 256          | 32           | 16         | 16          | 8         | 4           | 0.25       |
| C.p.2.051 | 1          | >256         | 4            | 16         | 32          | 8         | 2           | 0.25       |

---

|          |       |      |     |      |    |    |      |      |
|----------|-------|------|-----|------|----|----|------|------|
| 7        |       |      |     |      |    |    |      |      |
| C.p.2.06 | ≤0.12 | 64   | 0.5 | 16   | 16 | 8  | 2    | 0.25 |
| 1        |       |      |     |      |    |    |      |      |
| C.p.2.06 | 0.5   | 128  | 64  | 32   | 8  | 8  | 8    | 0.25 |
| 2        |       |      |     |      |    |    |      |      |
| C.p.2.06 | 0.5   | >256 | 32  | 128  | 16 | 8  | 2    | 0.5  |
| 7        |       |      |     |      |    |    |      |      |
| C.p.2.07 | 1     | 256  | 32  | 32   | 16 | 8  | 16   | 0.5  |
| 6        |       |      |     |      |    |    |      |      |
| C.p.2.07 | 1     | >256 | 128 | 1024 | 32 | 8  | >128 | 0.5  |
| 7        |       |      |     |      |    |    |      |      |
| C.p.2.07 | 0.25  | 256  | 32  | 64   | 16 | 8  | 32   | 0.25 |
| 8        |       |      |     |      |    |    |      |      |
| C.p.2.07 | 0.25  | >256 | 32  | 64   | 8  | 8  | 8    | 0.25 |
| 9        |       |      |     |      |    |    |      |      |
| C.p.2.08 | 1     | >256 | 16  | 16   | 4  | 8  | 1    | 0.5  |
| 1        |       |      |     |      |    |    |      |      |
| C.p.2.08 | ≤0.12 | 256  | 16  | 16   | 4  | 8  | 128  | 0.25 |
| 2        |       |      |     |      |    |    |      |      |
| C.p.2.08 | 0.25  | >256 | 32  | 16   | 4  | 8  | 1    | 0.25 |
| 5        |       |      |     |      |    |    |      |      |
| C.p.2.08 | 1     | >256 | 64  | 64   | 8  | 8  | 2    | 0.25 |
| 6        |       |      |     |      |    |    |      |      |
| C.p.2.08 | 2     | >256 | 64  | 32   | 8  | 8  | 1    | 0.25 |
| 7        |       |      |     |      |    |    |      |      |
| C.p.2.08 | 2     | >256 | 64  | 128  | 32 | 16 | 32   | 0.5  |
| 8        |       |      |     |      |    |    |      |      |
| C.p.2.08 | 1     | >256 | 32  | 64   | 64 | 16 | 8    | 1    |
| 9        |       |      |     |      |    |    |      |      |
| C.p.2.09 | 2     | >256 | 64  | 32   | 8  | 8  | 8    | 0.25 |
| 0        |       |      |     |      |    |    |      |      |
| C.p.2.09 | 2     | 256  | 32  | 128  | 32 | 16 | 8    | 0.25 |
| 2        |       |      |     |      |    |    |      |      |
| C.p.2.09 | 0.25  | >256 | 32  | 64   | 16 | 8  | 4    | 0.25 |
| 3        |       |      |     |      |    |    |      |      |
| C.p.2.09 | 1     | >256 | 64  | 64   | 8  | 16 | 8    | 0.25 |
| 4        |       |      |     |      |    |    |      |      |
| C.p.2.09 | 2     | >256 | 128 | 32   | 16 | 16 | 16   | 0.25 |
| 5        |       |      |     |      |    |    |      |      |
| C.p.2.09 | 1     | >256 | 64  | 128  | 32 | 16 | 8    | 0.25 |
| 6        |       |      |     |      |    |    |      |      |
| C.p.2.09 | 2     | >256 | 64  | 64   | 16 | 16 | 8    | 0.25 |
| 7        |       |      |     |      |    |    |      |      |
| C.p.2.09 | 1     | >256 | 64  | 64   | 32 | 16 | 8    | 0.25 |

---

|          |      |      |     |    |    |    |    |      |
|----------|------|------|-----|----|----|----|----|------|
| 9        |      |      |     |    |    |    |    |      |
| C.p.2.10 | 1    | >256 | 128 | 64 | 16 | 8  | 8  | 0.25 |
| 0        |      |      |     |    |    |    |    |      |
| C.p.2.10 | 1    | >256 | 64  | 64 | 16 | 8  | 8  | 0.25 |
| 1        |      |      |     |    |    |    |    |      |
| C.p.2.10 | 0.25 | >256 | 32  | 32 | 16 | 16 | 16 | 0.25 |
| 2        |      |      |     |    |    |    |    |      |
| C.p.2.10 | 2    | >256 | 128 | 64 | 16 | 8  | 8  | 0.25 |
| 3        |      |      |     |    |    |    |    |      |
| C.p.2.10 | 1    | >256 | 128 | 32 | 16 | 8  | 8  | 0.25 |
| 4        |      |      |     |    |    |    |    |      |
| C.p.2.10 | 1    | >256 | 64  | 32 | 8  | 16 | 8  | 0.25 |
| 5        |      |      |     |    |    |    |    |      |
| C.p.2.10 | 2    | >256 | 128 | 16 | 8  | 8  | 8  | 0.25 |
| 6        |      |      |     |    |    |    |    |      |
| C.p.2.10 | 2    | >256 | 64  | 32 | 16 | 16 | 8  | 0.12 |
| 7        |      |      |     |    |    |    |    |      |
| C.p.2.10 | 1    | >256 | 32  | 32 | 8  | 8  | 8  | 1    |
| 8        |      |      |     |    |    |    |    |      |
| C.p.2.10 | 1    | >256 | 128 | 64 | 16 | 8  | 8  | 0.25 |
| 9        |      |      |     |    |    |    |    |      |
| C.p.2.11 | 1    | >256 | 32  | 64 | 16 | 64 | 2  | 4    |
| 0        |      |      |     |    |    |    |    |      |
| C.p.2.11 | 1    | >256 | 64  | 32 | 16 | 16 | 32 | 0.25 |
| 1        |      |      |     |    |    |    |    |      |
| C.p.2.11 | 2    | >256 | 128 | 64 | 32 | 16 | 8  | 0.25 |
| 2        |      |      |     |    |    |    |    |      |
| C.p.2.11 | 1    | >256 | 64  | 32 | 16 | 16 | 8  | 0.12 |
| 4        |      |      |     |    |    |    |    |      |
| C.p.2.11 | 1    | >256 | 64  | 64 | 2  | 8  | 8  | 0.25 |
| 5        |      |      |     |    |    |    |    |      |
| C.p.2.11 | 4    | >256 | 32  | 32 | 32 | 16 | 1  | 0.25 |
| 6        |      |      |     |    |    |    |    |      |
| C.p.2.11 | 1    | >256 | 64  | 32 | 8  | 16 | 8  | 0.25 |
| 7        |      |      |     |    |    |    |    |      |
| C.p.2.11 | 0.5  | 256  | 4   | 64 | 16 | 8  | 4  | 0.25 |
| 8        |      |      |     |    |    |    |    |      |
| C.p.2.11 | 1    | >256 | 32  | 32 | 16 | 16 | 2  | 0.5  |
| 9        |      |      |     |    |    |    |    |      |
| C.p.2.12 | 1    | >256 | 64  | 16 | 8  | 4  | 4  | 0.12 |
| 0        |      |      |     |    |    |    |    |      |
| C.p.2.12 | 1    | >256 | 64  | 64 | 16 | 16 | 8  | 0.25 |
| 2        |      |      |     |    |    |    |    |      |
| C.p.2.12 | 2    | >256 | 64  | 64 | 16 | 16 | 8  | 0.25 |

---

|          |       |      |     |       |    |    |      |      |
|----------|-------|------|-----|-------|----|----|------|------|
| 3        |       |      |     |       |    |    |      |      |
| C.p.2.12 | 2     | >256 | 64  | 16    | 16 | 16 | 8    | 0.25 |
| 4        |       |      |     |       |    |    |      |      |
| C.p.2.12 | 1     | >256 | 64  | 64    | 8  | 8  | 4    | 0.25 |
| 5        |       |      |     |       |    |    |      |      |
| C.p.2.12 | 2     | >256 | 64  | 128   | 16 | 8  | 8    | 0.25 |
| 7        |       |      |     |       |    |    |      |      |
| C.p.2.12 | 0.25  | >256 | 8   | 64    | 4  | 8  | 4    | 0.12 |
| 8        |       |      |     |       |    |    |      |      |
| C.p.2.12 | ≤0.12 | >256 | 4   | 32    | 64 | 8  | 4    | 0.12 |
| 9        |       |      |     |       |    |    |      |      |
| C.p.2.13 | 2     | >256 | 16  | 16    | 16 | 16 | 0.5  | 0.25 |
| 1        |       |      |     |       |    |    |      |      |
| C.p.2.13 | 1     | >256 | 64  | 32    | 16 | 8  | 4    | 0.12 |
| 3        |       |      |     |       |    |    |      |      |
| C.p.2.13 | 1     | >256 | 64  | 32    | 8  | 8  | 4    | 0.12 |
| 5        |       |      |     |       |    |    |      |      |
| C.p.2.13 | 1     | >256 | 64  | 64    | 4  | 8  | 4    | 0.12 |
| 6        |       |      |     |       |    |    |      |      |
| C.p.2.13 | 1     | >256 | 64  | 1024  | 32 | 8  | >128 | 0.25 |
| 8        |       |      |     |       |    |    |      |      |
| C.p.2.13 | 1     | >256 | 64  | 64    | 16 | 8  | 8    | 0.25 |
| 9        |       |      |     |       |    |    |      |      |
| C.p.2.14 | 1     | >256 | 128 | >2048 | 64 | 8  | >128 | 0.5  |
| 0        |       |      |     |       |    |    |      |      |
| C.p.2.14 | 2     | >256 | 16  | 32    | 16 | 8  | 4    | 0.25 |
| 1        |       |      |     |       |    |    |      |      |
| C.p.2.14 | 1     | >256 | 128 | 32    | 16 | 16 | 8    | 0.25 |
| 2        |       |      |     |       |    |    |      |      |
| C.p.2.14 | 1     | >256 | 128 | 64    | 16 | 8  | 8    | 0.25 |
| 3        |       |      |     |       |    |    |      |      |
| C.p.2.14 | 1     | >256 | 128 | 64    | 8  | 32 | 8    | 0.12 |
| 4        |       |      |     |       |    |    |      |      |
| C.p.2.14 | 1     | >256 | 128 | 64    | 16 | 16 | 8    | 0.25 |
| 5        |       |      |     |       |    |    |      |      |
| C.p.2.14 | 2     | >256 | 128 | 2048  | 32 | 8  | >128 | 0.5  |
| 6        |       |      |     |       |    |    |      |      |
| C.p.2.14 | 2     | >256 | 64  | 32    | 8  | 8  | 0.5  | 0.25 |
| 8        |       |      |     |       |    |    |      |      |
| C.p.2.14 | 1     | >256 | 128 | >2048 | 32 | 8  | >128 | 0.5  |
| 9        |       |      |     |       |    |    |      |      |
| C.p.2.15 | 1     | >256 | 128 | 32    | 32 | 16 | 8    | 0.12 |
| 0        |       |      |     |       |    |    |      |      |
| C.p.2.15 | 1     | >256 | 128 | 32    | 8  | 8  | 4    | 0.12 |

---

|          |       |      |     |       |    |    |      |      |
|----------|-------|------|-----|-------|----|----|------|------|
| 3        |       |      |     |       |    |    |      |      |
| C.p.2.15 | 1     | >256 | 128 | 64    | 4  | 8  | 4    | 0.25 |
| 4        |       |      |     |       |    |    |      |      |
| C.p.2.15 | 0.5   | >256 | 64  | >2048 | 32 | 8  | >128 | 0.5  |
| 5        |       |      |     |       |    |    |      |      |
| C.p.2.15 | 1     | >256 | 64  | >2048 | 32 | 8  | >128 | 0.5  |
| 6        |       |      |     |       |    |    |      |      |
| C.p.2.15 | 0.5   | 256  | 32  | 16    | 64 | 8  | 4    | 1    |
| 7        |       |      |     |       |    |    |      |      |
| C.p.2.15 | 2     | >256 | 64  | 32    | 8  | 8  | 4    | 0.12 |
| 8        |       |      |     |       |    |    |      |      |
| C.p.2.15 | 1     | >256 | 32  | 64    | 16 | 8  | 2    | 0.12 |
| 9        |       |      |     |       |    |    |      |      |
| C.p.2.16 | 2     | >256 | 64  | 64    | 16 | 16 | 8    | 0.25 |
| 0        |       |      |     |       |    |    |      |      |
| C.p.2.16 | 1     | >256 | 128 | >2048 | 64 | 8  | >128 | 2    |
| 1        |       |      |     |       |    |    |      |      |
| C.p.2.16 | 2     | >256 | 64  | >2048 | 64 | 8  | >128 | 0.5  |
| 2        |       |      |     |       |    |    |      |      |
| C.p.2.16 | 1     | 256  | 16  | 64    | 32 | 16 | 0.25 | 0.03 |
| 3        |       |      |     |       |    |    |      |      |
| C.p.2.16 | 2     | >256 | 64  | >2048 | 32 | 8  | >128 | 0.5  |
| 4        |       |      |     |       |    |    |      |      |
| C.p.2.16 | 1     | >256 | 32  | 16    | 8  | 8  | 2    | 0.25 |
| 5        |       |      |     |       |    |    |      |      |
| C.p.2.16 | 1     | >256 | 64  | >2048 | 32 | 8  | >128 | 0.5  |
| 6        |       |      |     |       |    |    |      |      |
| C.p.2.16 | 1     | >256 | 128 | 1024  | 32 | 8  | >128 | 0.5  |
| 7        |       |      |     |       |    |    |      |      |
| C.p.2.16 | 0.25  | >256 | 64  | 16    | 16 | 8  | 1    | 0.12 |
| 8        |       |      |     |       |    |    |      |      |
| C.p.2.16 | 0.25  | >256 | 64  | 32    | 16 | 8  | 1    | 0.25 |
| 9        |       |      |     |       |    |    |      |      |
| C.p.2.17 | ≤0.12 | >256 | 32  | 64    | 32 | 16 | 8    | 0.5  |
| 0        |       |      |     |       |    |    |      |      |
| C.p.2.17 | 1     | >256 | 64  | 16    | 16 | 16 | 4    | 0.12 |
| 1        |       |      |     |       |    |    |      |      |
| C.p.2.27 | 1     | >256 | 32  | 128   | 64 | 16 | 8    | 2    |
| 8        |       |      |     |       |    |    |      |      |
| C.p.2.42 | 1     | >256 | 32  | 32    | 8  | 8  | 2    | 0.25 |
| 9        |       |      |     |       |    |    |      |      |
| C.p.2.49 | 1     | >256 | 32  | 32    | 4  | 8  | 0.5  | 0.12 |
| 7        |       |      |     |       |    |    |      |      |
| C.p.2.53 | 1     | >256 | 64  | 64    | 16 | 16 | 4    | 0.25 |

---

|          |       |      |      |       |     |    |      |      |
|----------|-------|------|------|-------|-----|----|------|------|
| 8        |       |      |      |       |     |    |      |      |
| C.p.2.56 | 1     | >256 | 64   | 2048  | 32  | 8  | >128 | 0.5  |
| 0        |       |      |      |       |     |    |      |      |
| C.p.2.56 | 1     | >256 | 64   | >2048 | 32  | 8  | >128 | 0.25 |
| 8        |       |      |      |       |     |    |      |      |
| C.p.2.56 | 1     | >256 | 32   | 64    | 16  | 8  | 4    | 0.25 |
| 9        |       |      |      |       |     |    |      |      |
| C.p.2.57 | 1     | >256 | 64   | 64    | 16  | 16 | 2    | 0.12 |
| 5        |       |      |      |       |     |    |      |      |
| C.Pe193  | 2     | >256 | 64   | 64    | 16  | 8  | 2    | 0.25 |
| C.Pe198  | 2     | >256 | 128  | 64    | 16  | 8  | 8    | 0.25 |
| C.pe202  | ≤0.12 | >256 | 16   | 512   | 16  | 8  | >128 | 0.25 |
| C.pe214  | 2     | >256 | 64   | 128   | 8   | 8  | 16   | 0.25 |
| C.pe218  | 2     | >256 | 64   | 64    | 4   | 8  | >128 | 0.25 |
| C.pe220  | 1     | >256 | 128  | 64    | 16  | 8  | 8    | 0.25 |
| C.pe225  | 1     | 256  | 32   | 64    | 32  | 16 | 8    | 0.25 |
| C.pe228  | 2     | >256 | 128  | 64    | 8   | 8  | >128 | 0.25 |
| C.pe484  | 1     | 1    | 4    | 32    | 16  | 8  | 2    | 0.25 |
| C.pe487  | 1     | >256 | 8    | 512   | 16  | 4  | 128  | 0.25 |
| GZA1H    | ≤0.12 | >256 | >128 | >2048 | 128 | 32 | 128  | 2    |
| B        |       |      |      |       |     |    |      |      |
| GZA2H    | 1     | >256 | 128  | >2048 | 32  | 8  | >128 | 1    |
| B        |       |      |      |       |     |    |      |      |
| HNA2H    | 1     | >256 | >128 | >2048 | 64  | 16 | 128  | 2    |
| B        |       |      |      |       |     |    |      |      |
| HNA4F    | 2     | >256 | 64   | >2048 | 64  | 16 | >128 | 1    |
| D        |       |      |      |       |     |    |      |      |
| HNA5H    | 2     | >256 | 16   | 8     | 8   | 8  | 2    | 0.12 |
| B        |       |      |      |       |     |    |      |      |
| HNA6FB   | 0.5   | >256 | 64   | >2048 | 32  | 8  | 2    | 0.25 |
| HNA8FB   | 0.5   | >256 | 128  | >2048 | 32  | 16 | 1    | 0.25 |
| HNA8H    | 1     | >256 | 32   | 16    | 16  | 8  | 2    | 0.12 |
| B        |       |      |      |       |     |    |      |      |
| HNA9FB   | ≤0.12 | >256 | 64   | >2048 | 32  | 8  | >128 | 0.12 |
| HNA9H    | 1     | >256 | 8    | 64    | 8   | 8  | 1    | 0.12 |
| B        |       |      |      |       |     |    |      |      |
| SXA2FB   | 1     | >256 | 128  | >2048 | 64  | 8  | >128 | 0.5  |
| SXB1FB   | 1     | >256 | 32   | 64    | 32  | 8  | 2    | 0.25 |
| SXB1HB   | 1     | >256 | 128  | >2048 | 64  | 8  | >128 | 0.5  |
| C.p.2.28 | 2     | >256 | 64   | 128   | 8   | 8  | 16   | 0.25 |
| 7        |       |      |      |       |     |    |      |      |
| C.p.2.29 | 2     | >256 | 64   | 64    | 4   | 8  | >128 | 0.25 |
| 8        |       |      |      |       |     |    |      |      |
| C.p.2.29 | 1     | >256 | 128  | 64    | 16  | 8  | 8    | 0.25 |



Table2 Toxin-activity gene cpa pcr program

| A. Primer Information |                                       |                                       |                        | B. PCR Reaction System<br>(Total Volume: 20 µL)                         |                |                                                        | C. PCR Amplification Program |        |        |
|-----------------------|---------------------------------------|---------------------------------------|------------------------|-------------------------------------------------------------------------|----------------|--------------------------------------------------------|------------------------------|--------|--------|
| Gene                  | Forward primer<br>sequence<br>(5'→3') | Reverse primer<br>sequence<br>(5'→3') | Product length<br>(bp) | Component                                                               | Volume<br>(µL) | Note                                                   | Temperature<br>(°C)          | Time   | Cycles |
| *cpa                  | GCTAAT<br>GTTAC                       | CCTCT<br>GATAC                        | 325                    | Forward primer                                                          | 1              | -                                                      | 95                           | 5 min  | 1      |
| *                     | TGCCG<br>TTGA                         | ATCGT<br>GTAAG                        |                        | Reverse primer                                                          | 1              | -                                                      | 95                           | 30 s   | 35     |
|                       |                                       |                                       |                        | 2×Taq<br>PCR<br>StarMix<br>with<br>Loading<br>Dye<br>ddH <sub>2</sub> O | 10             | Contains<br>Taq<br>enzyme,<br>dNTPs,<br>loading<br>dye | 55                           | 30 s   | 35     |
|                       |                                       |                                       |                        | ddH <sub>2</sub> O                                                      | 5              | Nuclease<br>-free                                      | 72                           | 30 s   | 35     |
|                       |                                       |                                       |                        | DNA<br>template                                                         | 3              | Genomic<br>DNA of<br>*Clostridium<br>perfringens*      | 72                           | 10 min | 1      |
|                       |                                       |                                       |                        | <b>Total</b>                                                            | <b>20</b>      | Final<br>volume                                        | 4                            | 30 min | 1      |
